# Supplementary material
Source: PubMed Central journal article supplement (PMC3477210)
Supplement: supp_112.196071_JPET196071_supplemental_material.pdf [file supp_112.196071_JPET196071_supplemental_material.pdf]

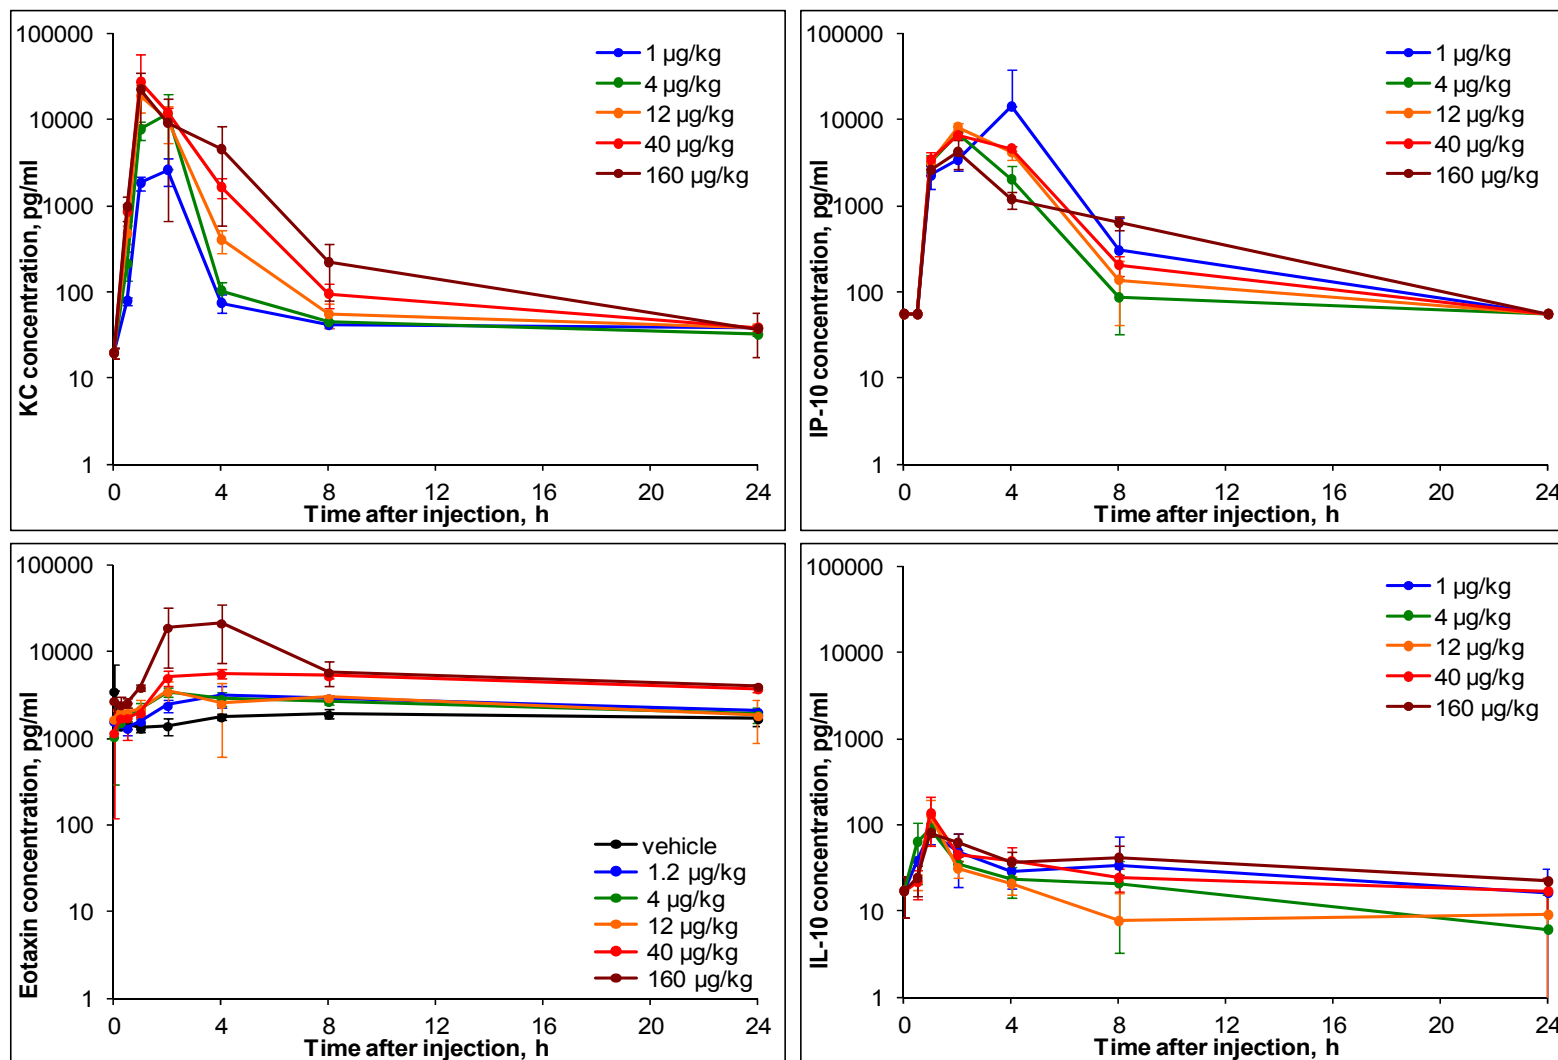

**Supplemental Figure S1. Additional cytokines induced by CBLB502 in non-irradiated ICR mice after i.m. injection.** Time-dependent changes in plasma cytokine levels in non-irradiated female ICR mice injected i.m. with either the vehicle or with the indicated doses of CBLB502. Each data point represents mean  $\pm$  SD of cytokine concentration measured in plasma of 3 mice. G-CSF, IL-6, KC, IP-10, Eotaxin, IL-10, IL-1a, IL-1b, IL12p70, TNF, GM-CSF, TPO, SCF were tested. IL-1a, IL-1b, IL12p70, TNF, GM-CSF, TPO, SCF did not display substantial or consistent response. IL-10 had shown very minor response.

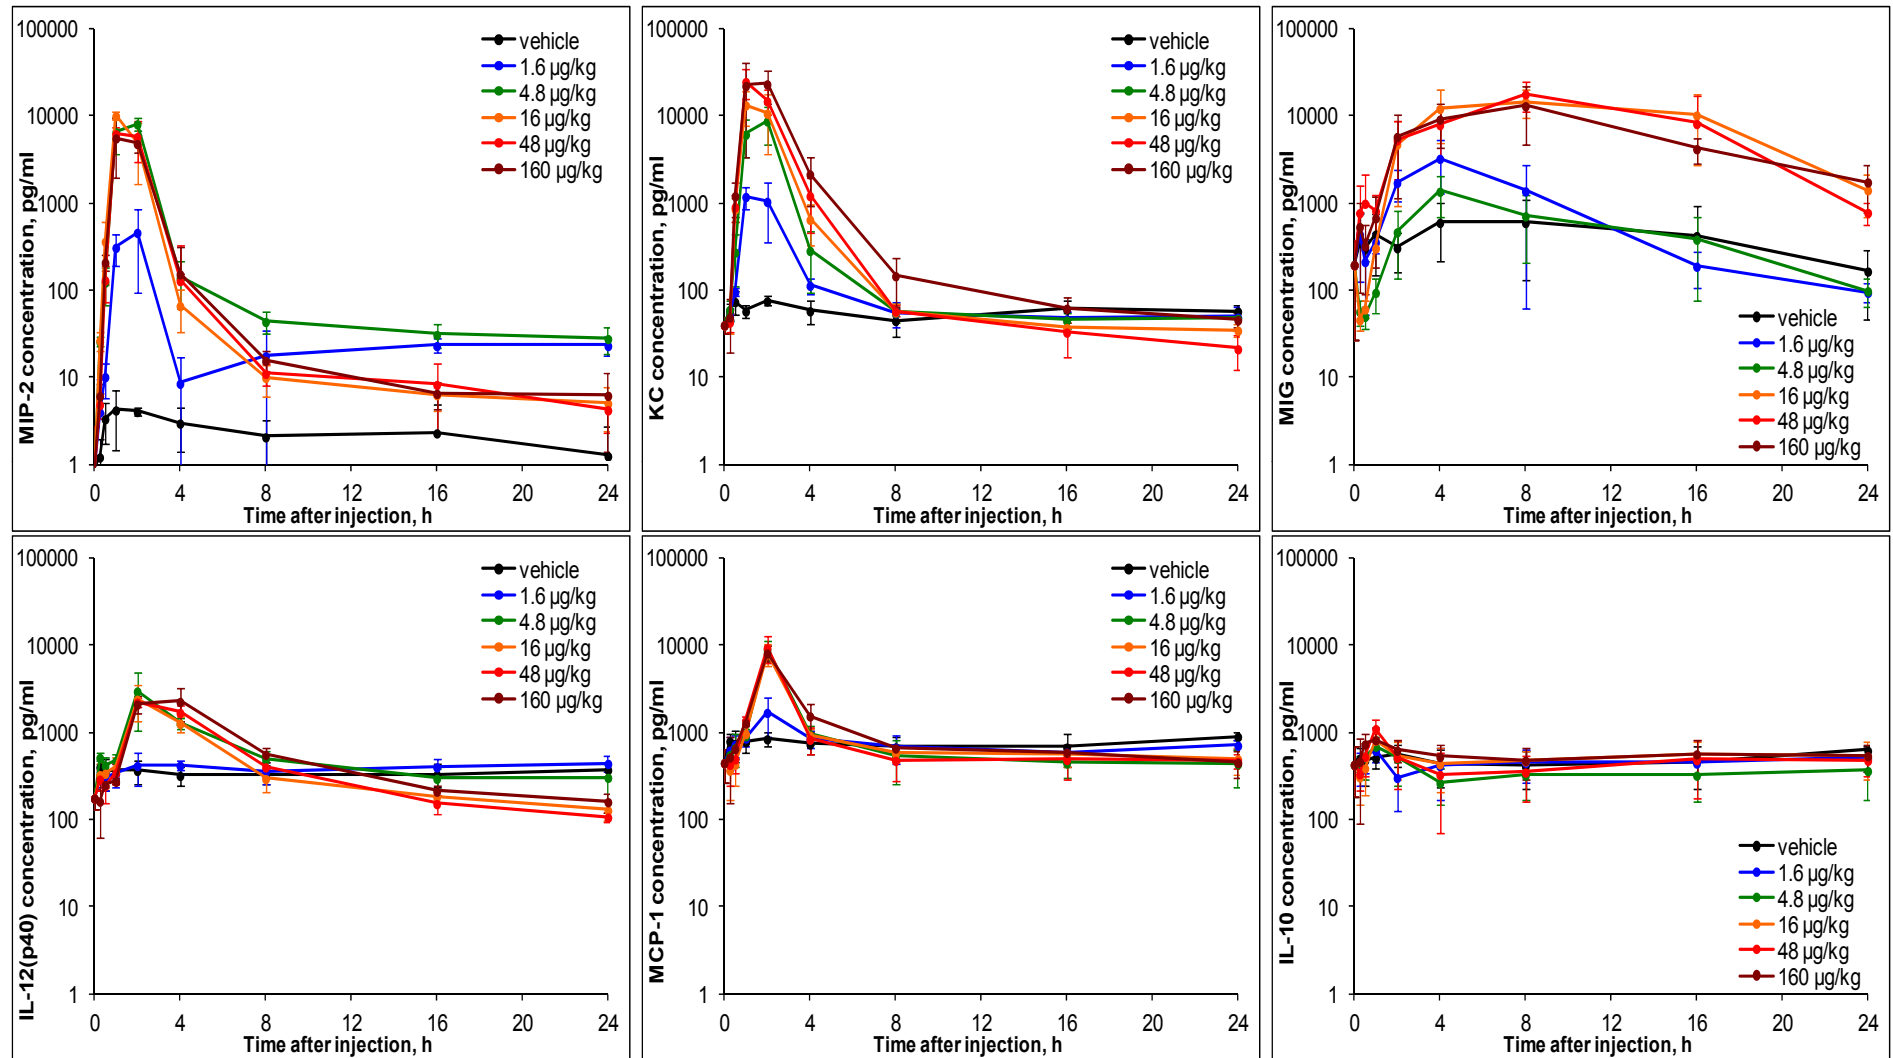

**Supplemental Figure S2. Additional cytokines induced by CBLB502 in non-irradiated C57BL/6J mice after s.c. injection.** Time-dependent changes in plasma cytokines levels in non-irradiated female C57BL/6J mice injected s.c. with either the vehicle or with the indicated doses of CBLB502. Each data point represents mean  $\pm$  SD of cytokine concentration measured in plasma of 6 mice. G-CSF, IL-6, KC, IL-10, IL12p40, TNF, MCP-1, MIP-2, MIG were tested. IL-10 showed a very minor response. TNF did not show a consistent response. One outlier sample (vehicle/16 h, very high levels of MIG and MIP-2) was excluded.

Krivokrysenko, et al.

Identification of G-CSF and IL-6 as Candidate Biomarkers of CBLB502's Efficacy as a Medical Radiation Countermeasure  
*Journal of Pharmacology and Experimental Therapeutics*

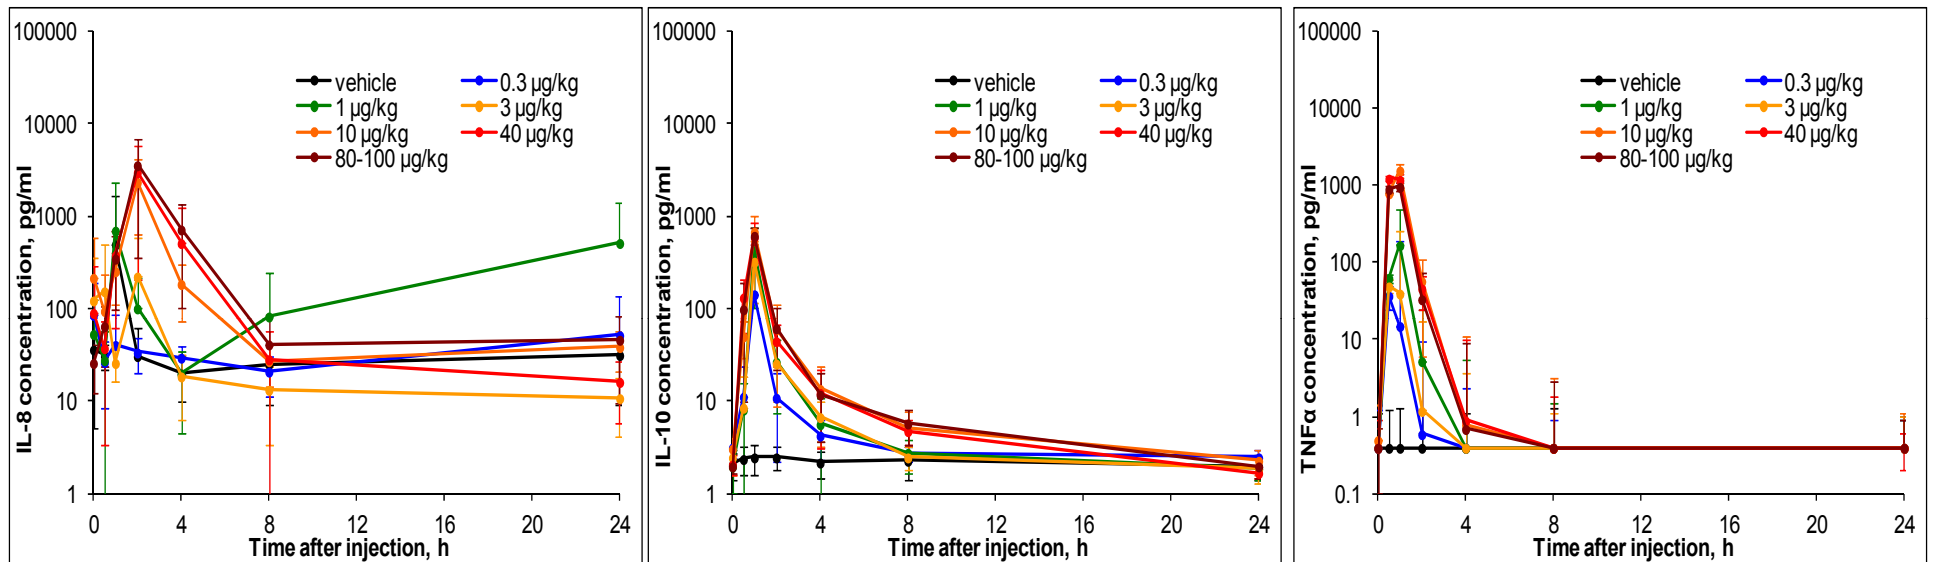

**Supplemental Figure S3. Additional cytokines induced by CBLB502 in non-irradiated beagle dogs after i.m. injection.** Time-dependent changes in plasma cytokine levels in non-irradiated male and female beagle dogs (n=6, 1:1 sex ratio) injected i.m. with either the vehicle or with the indicated doses of CBLB502. Each data point represents mean  $\pm$  SD. IL-6, IL-8, IL-10, and TNF were tested; all showed a CBLB502-dependent response.

Krivokrysenko, et al.

Identification of G-CSF and IL-6 as Candidate Biomarkers of CBLB502's Efficacy as a Medical Radiation Countermeasure

*Journal of Pharmacology and Experimental Therapeutics*

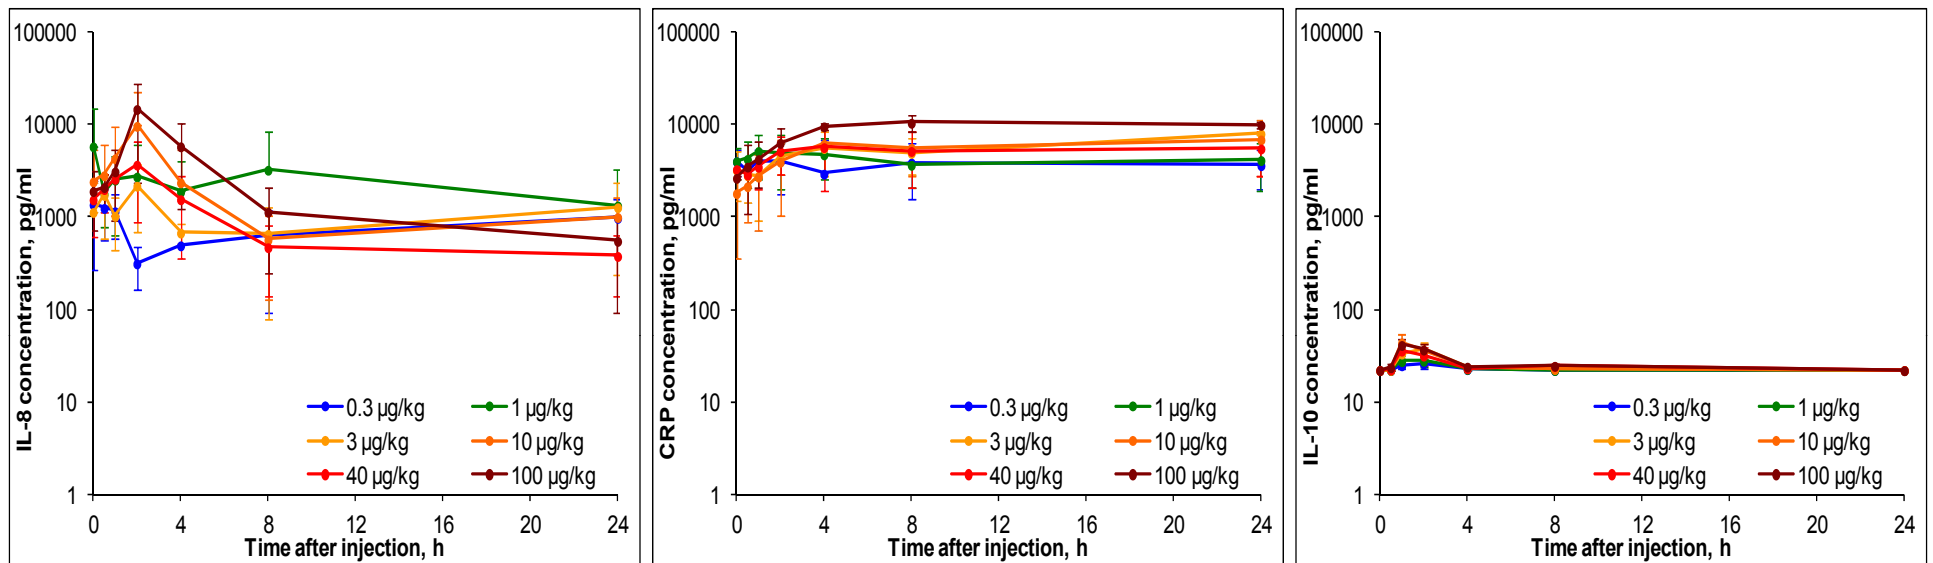

**Supplemental Figure S4. Additional cytokines and other factors induced by CBLB502 in non-irradiated rhesus macaques after i.m. injection.** Time-dependent changes in levels of plasma cytokines and other factors in non-irradiated male and female rhesus macaques (n=6, 1:1 sex ratio) injected i.m. with either the vehicle or with the indicated doses of CBLB502. Each data point represents mean  $\pm$  SD. G-CSF, IL-6, IL-8, IL-10, C-reactive protein, IL-1b, IL12p70, IP-10, GM-CSF were tested. IL-1b, IL12p70, IP-10, GM-CSF did not display substantial or consistent responses. IL-10 showed a very minor response. However, this was later found to be assay-related in later studies, with larger-scale IL-10 responses observed with newer assays.

Krivokrysenko, et al.

Identification of G-CSF and IL-6 as Candidate Biomarkers of CBLB502's Efficacy as a Medical Radiation Countermeasure

*Journal of Pharmacology and Experimental Therapeutics*

**Supplemental Table S1.** Effect of 60 µg/kg CBLB502 treatment administered s.c. or i.v. 24 hours after 8.5-9.5 Gy TBI on survival of irradiated C57BL/6J mice.

| Route | TBI dose (Gy) | 30-day survival (% and fraction) |               | P-value vs. control | Absolute survival increase, % | Odds ratio vs. control |
|-------|---------------|----------------------------------|---------------|---------------------|-------------------------------|------------------------|
|       |               | vehicle                          | CBLB502       |                     |                               |                        |
| s.c.  | 8.5           | 52.5% (21/40)                    | 85.0% (34/40) | <b>0.003</b>        | +32.5%                        | 5.1                    |
|       | 9             | 22.5% (9/40)                     | 45.0% (18/40) | 0.058               | +22.5%                        | 2.8                    |
|       | 9.5           | 7.5% (3/40)                      | 27.5% (11/40) | <b>0.037</b>        | +20.0%                        | 4.7                    |
| i.v.  | 8.5           | 82.5% (33/40)                    | 97.5% (39/40) | <b>0.015</b>        | +15.0%                        | 8.3                    |
|       | 9             | 55.0% (22/40)                    | 80.0% (32/40) | <b>0.031</b>        | +25.0%                        | 3.3                    |
|       | 9.5           | 10.0% (4/40)                     | 45.0% (18/40) | <b>0.0009</b>       | +35.0%                        | 7.4                    |
